# Supplementary material for: In vivo multiple color lymphatic imaging using upconverting nanocrystals
Source: Royal Society of Chemistry journal article supplement (doi:10.1039/b910512c), 2009-01-01
Supplement: b910512c.pdf [file b910512c.pdf]

## Supplementary Data

# ***In vivo* Multiple Color Lymphatic Imaging Using Upconverting Nanocrystals.**

Hisataka Kobayashi<sup>1</sup>, Nobuyuki Kosaka<sup>1</sup>, Mikako Ogawa<sup>1</sup>,  
Nicole Y. Morgan<sup>2</sup>, Paul D. Smith<sup>2</sup>, Christopher B. Murray<sup>3</sup>, Xingchen Ye<sup>3</sup>,  
Josh Collins<sup>3</sup>, Ajith Kumar<sup>4</sup>, Howard Bell<sup>4</sup>, Peter L. Choyke<sup>1</sup>

<sup>1</sup>Molecular Imaging Program, Center for Cancer Research, National Cancer Institute,  
NIH, Bethesda, MD 20892-1088

<sup>2</sup>National Institute of Biomedical Imaging and Bioengineering, NIH, Bethesda, MD  
20892

<sup>3</sup>University of Pennsylvania. Philadelphia, PA 19104

<sup>4</sup>Sunstone BioSciences, Inc., Philadelphia, PA 19104

\*Corresponding author: Hisataka Kobayashi, MD, PhD

Molecular Imaging Program, NCI/NIH,

Bldg. 10, Room 1B40, MSC 1088, Bethesda, Maryland 20892-1088, USA

E-mail: Kobayash@mail.nih.gov

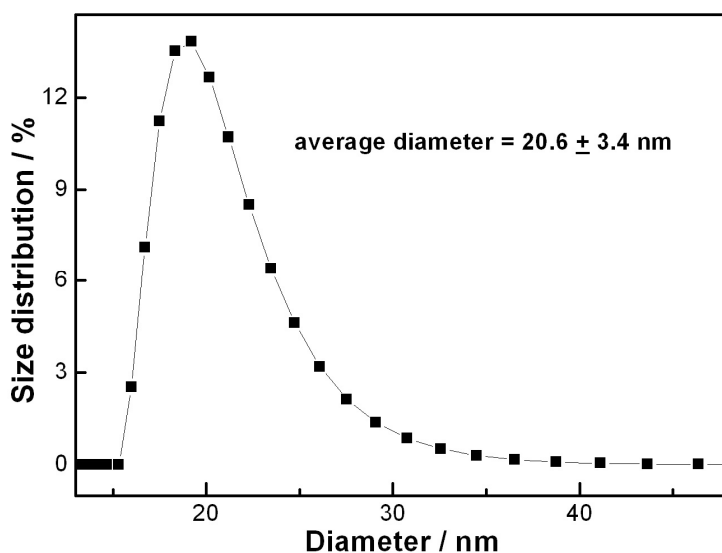

**Supplementary figure 1.** Dynamic light scattering (DLS) measurements were performed on a Delsa™ Nano C system (Beckman Coulter). Hexane solutions of nanocrystals with concentration of about 0.2mg/ml were used. DLS data for the as-synthesized nanocrystals confirm the TEM results, showing an average particle size of 20.6-nm, seen in figure 1.

DLS data on the as-injected, functionalized nanocrystal suspension is not currently available, however based on previously published works<sup>1,2</sup>, we surmise a surface PEG coating of ~15-20-nm in thickness, yielding an approximate final particle size of 50-60-nm in diameter.

In order to eliminate the aggregation or contamination, injected solution was safely passed through 0.22mm-filter (Millipore, Bedford, MA) immediately before injection with minimal loss, which was measured by the spectral absorbance with a UV-Vis system (8453 Value UV-Visible Value System; Agilent Technologies, Santa Clara, CA).

1. Z. Liu, C. Davis, W. Cai, L. He, X. Chen, H. Dai. *Proc. Natl. Acad. Science*, 2008, **105**, 1410-1415.
2. Torchilin, et.al. *Eur J Pharm Biopharm.* 2006, **62(3)**, 235-240.

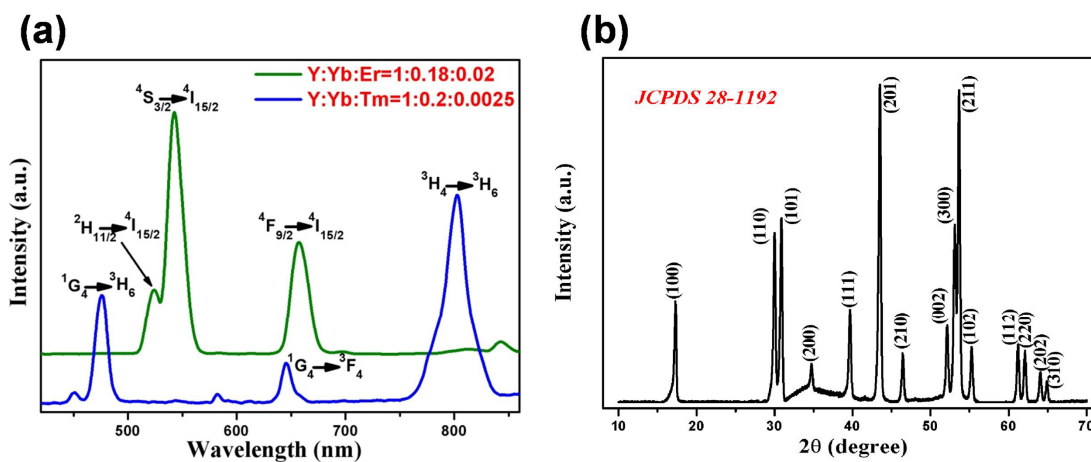

**Supplementary figure 2.** (a) Room temperature upconversion emission spectra of NaYF<sub>4</sub>:Yb/Er (green) and NaYF<sub>4</sub>:Yb/Tm (blue) nanocrystals under 980nm excitation. (b) Powder X-ray diffraction pattern of the NaYF<sub>4</sub>:Yb/Er nanocrystals.

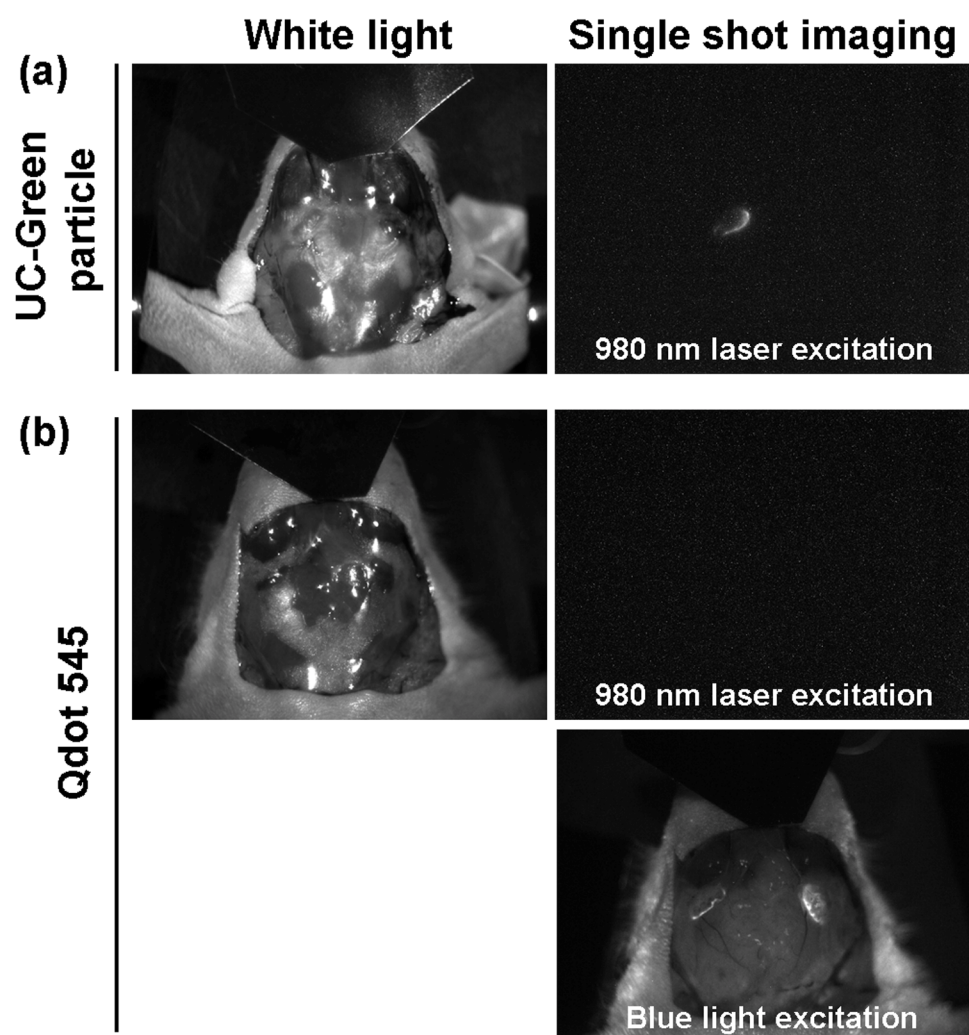

**Supplementary figure 3.** Comparative single shot fluorescence lymphatic imaging obtained at 550 nm after injection of either the green upconverting nanocrystal (980 nm excitation) or the quantum dot 545 (468 nm excitation). No background is observed with the green upconverting nanocrystal. In contrast, due to the autofluorescence, the body structures are clearly shown in the image obtained with the quantum dot 545.
